# Supplementary material for: Micro-dystrophin AAV Vectors Made by Transient Transfection and Herpesvirus System Are Equally Potent in Treating mdx Mouse Muscle Disease
Source: PubMed Central journal article supplement — Mol Ther Methods Clin Dev. 2020 Jul 9;18:664–78. doi: 10.1016/j.omtm.2020.07.004 (PMC7403893; doi:10.1016/j.omtm.2020.07.004), 2020-07-09
Supplement: mmc1.pdf [file mmc1.pdf]

**Supplemental Information**

**Micro-dystrophin AAV Vectors Made by Transient  
Transfection and Herpesvirus System Are Equally  
Potent in Treating mdx Mouse Muscle Disease**

**Chady H. Hakim, Nathalie Clément, Lakmini P. Wasala, Hsiao T. Yang, Yongping Yue, Keqing Zhang, Kasun Kodippili, Laura Adamson-Small, Xiufang Pan, Joel S. Schneider, N. Nora Yang, Jeffrey S. Chamberlain, Barry J. Byrne, and Dongsheng Duan**

**Micro-dystrophin AAV vectors made by transient transfection and herpesvirus system are equally potent in treating mdx mouse muscle disease**

Chady H. Hakim<sup>1,2</sup>, Nathalie Clément<sup>3</sup>, Lakmini P. Wasala<sup>1</sup>, Hsiao T. Yang<sup>1</sup>, Yongping Yue<sup>1</sup>, Keqing Zhang<sup>1</sup>, Kasun Kodippili<sup>1</sup>, Laura Adamson-Small<sup>3</sup>, Xiufang Pan<sup>1</sup>, Joel S. Schneider<sup>4</sup>, N. Nora Yang<sup>2</sup>, Jeffrey S. Chamberlain<sup>5</sup>, Barry J. Byrne<sup>3</sup>, Dongsheng Duan<sup>1,6,7,8\*</sup>

1, Department of Molecular Microbiology and Immunology, School of Medicine, The University of Missouri, Columbia, MO, USA.

2. National Center for Advancing Translational Sciences, NIH, Bethesda, MD, USA.

3. Department of Pediatrics, Powell Gene Therapy Center, University of Florida, Gainesville, FL, USA.

4. Solid Biosciences, 141 Portland Street, Cambridge, MA, USA.

5. Department of Neurology, Wellstone Muscular Dystrophy Specialized Research Center, University of Washington School of Medicine, Seattle WA, USA.

6, Department of Neurology, School of Medicine, The University of Missouri, Columbia, MO, USA.

7. Department of Biomedical Sciences, College of Veterinary Medicine, The University of Missouri, Columbia, MO, USA.

8. Department of Biomedical, Biological & Chemical Engineering, College of Engineering, The University of Missouri, Columbia, MO, USA.

\*Corresponding author: Dongsheng Duan Ph.D.  
Professor  
Department of Molecular Microbiology and Immunology  
One Hospital Dr.  
Columbia, MO 65212  
Phone: 573-884-9584  
Fax: 573-882-4287  
Email: [duand@missouri.edu](mailto:duand@missouri.edu)

**Short title:** AAV made by TT and HSV methods are equally potent

## Supplemental Figure 1

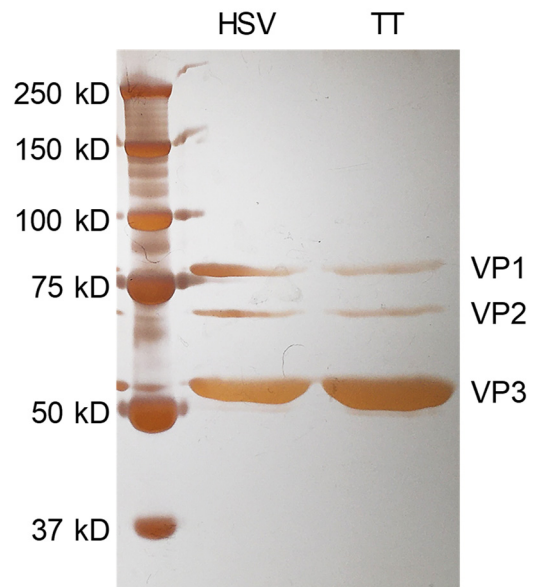

**Figure S1. Evaluation of AAV purity by Silver staining.**  $5 \times 10^{10}$  vg particles of purified AAV vectors were loaded in each lane. TT, AAV made with the transient transfection method. HSV, AAV made with the herpes simplex virus system.

Supplemental Figure 2

A

EDL muscle

High dose

Medium dose

Low dose

TT

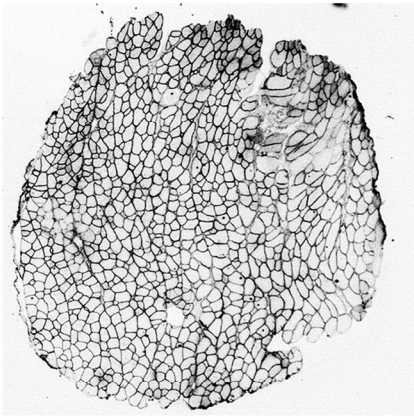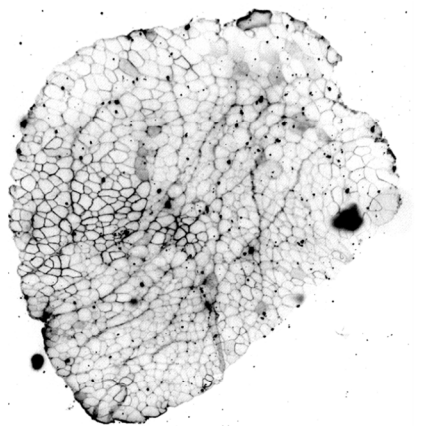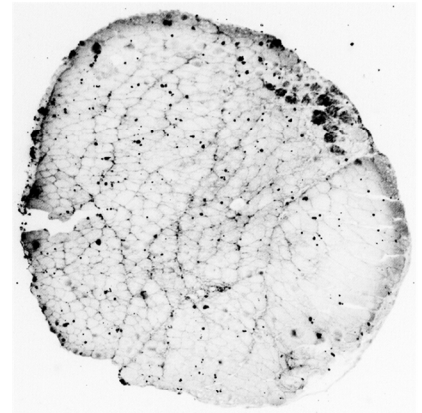

HSV

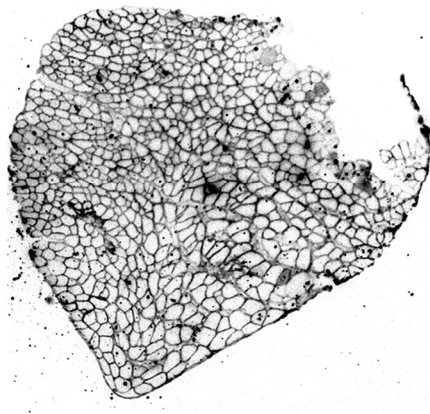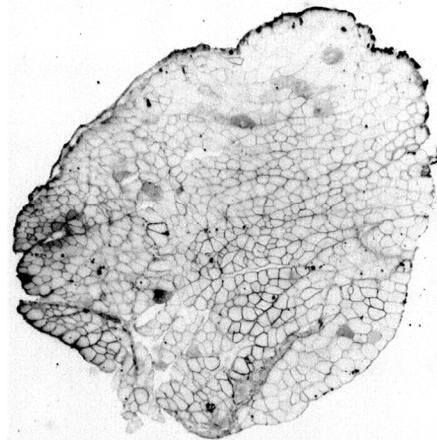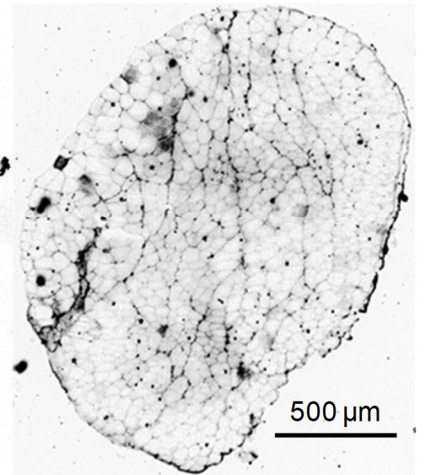

B

TA muscle

High dose

Medium dose —

Low dose

TT

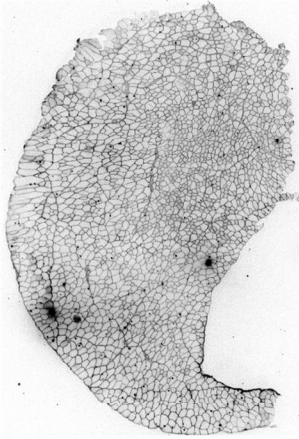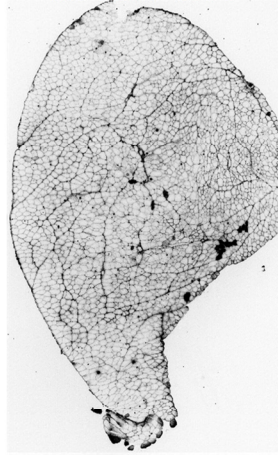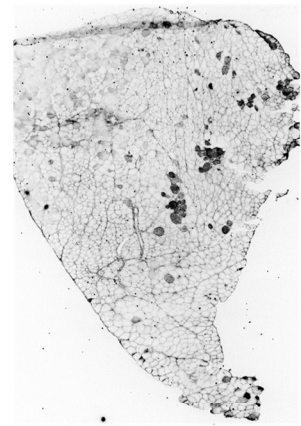

HSV

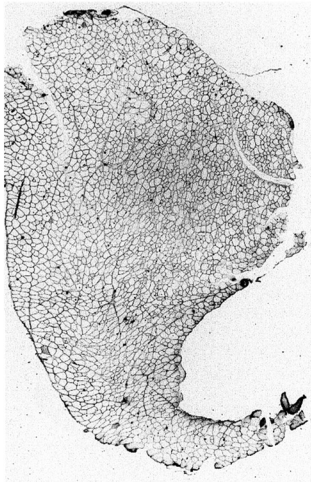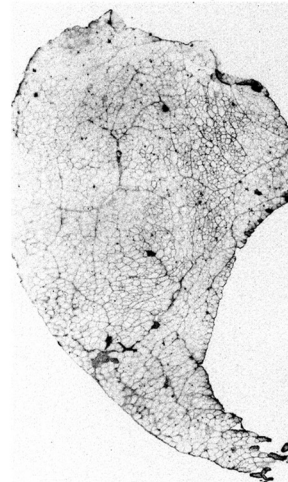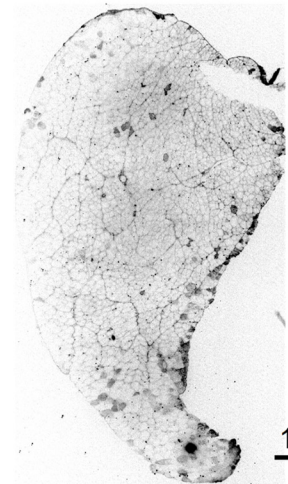

1 mm



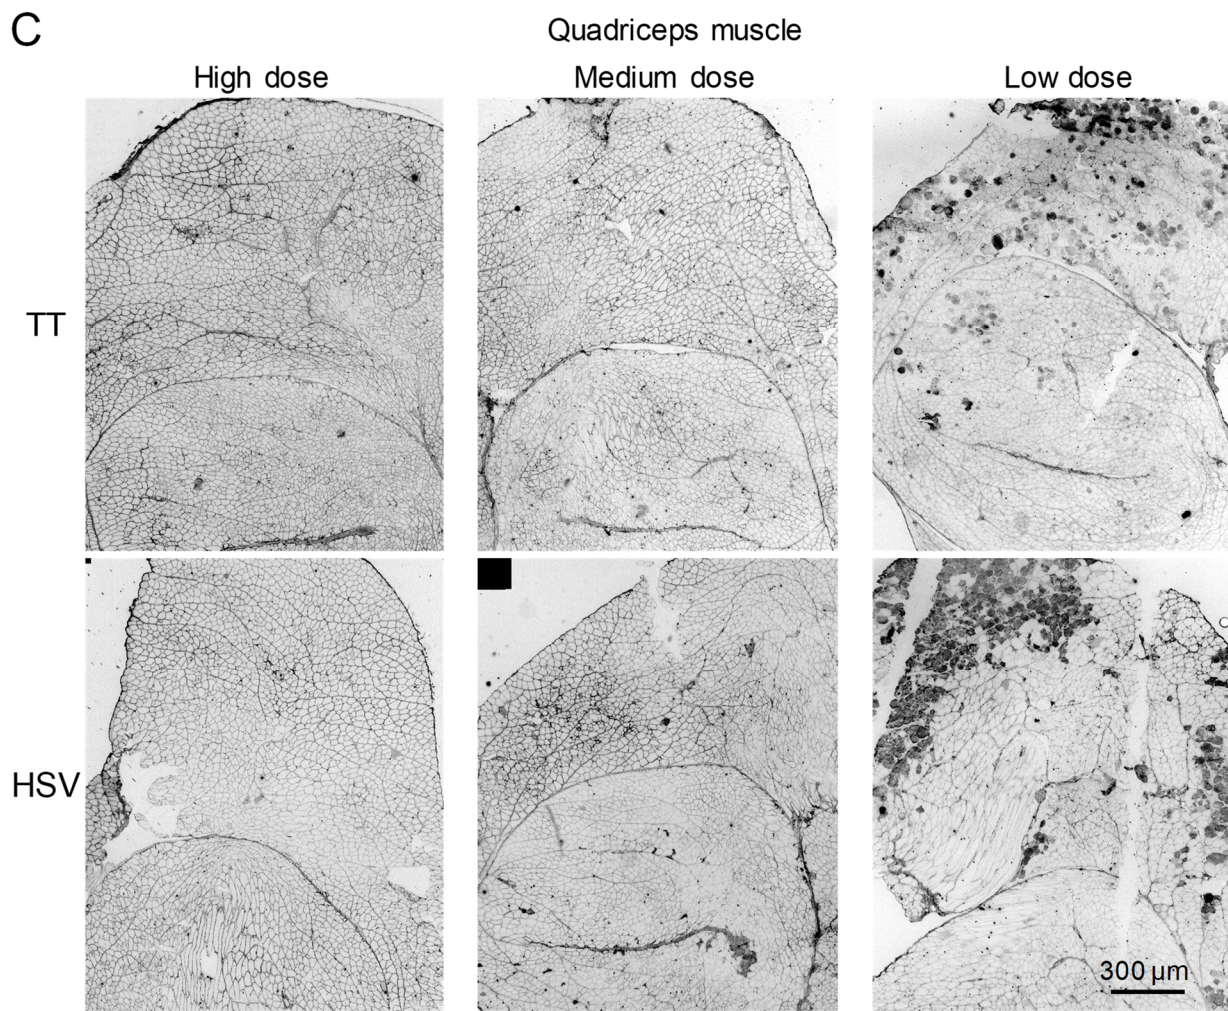

**Figure S2. Representative full-view dystrophin immunostaining photomicrographs.** **A**, The extensor digitorum longus. **B**, The tibialis anterior. **C**, The quadriceps. TT, AAV made with the transient transfection method. HSV, AAV made with the herpes simplex virus system.

Supplemental Figure 3

A

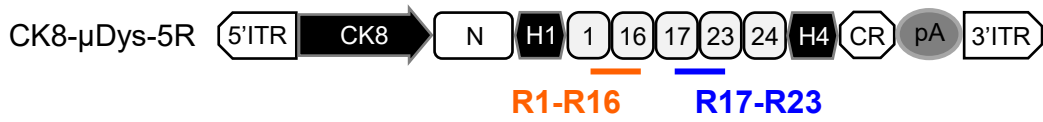

B

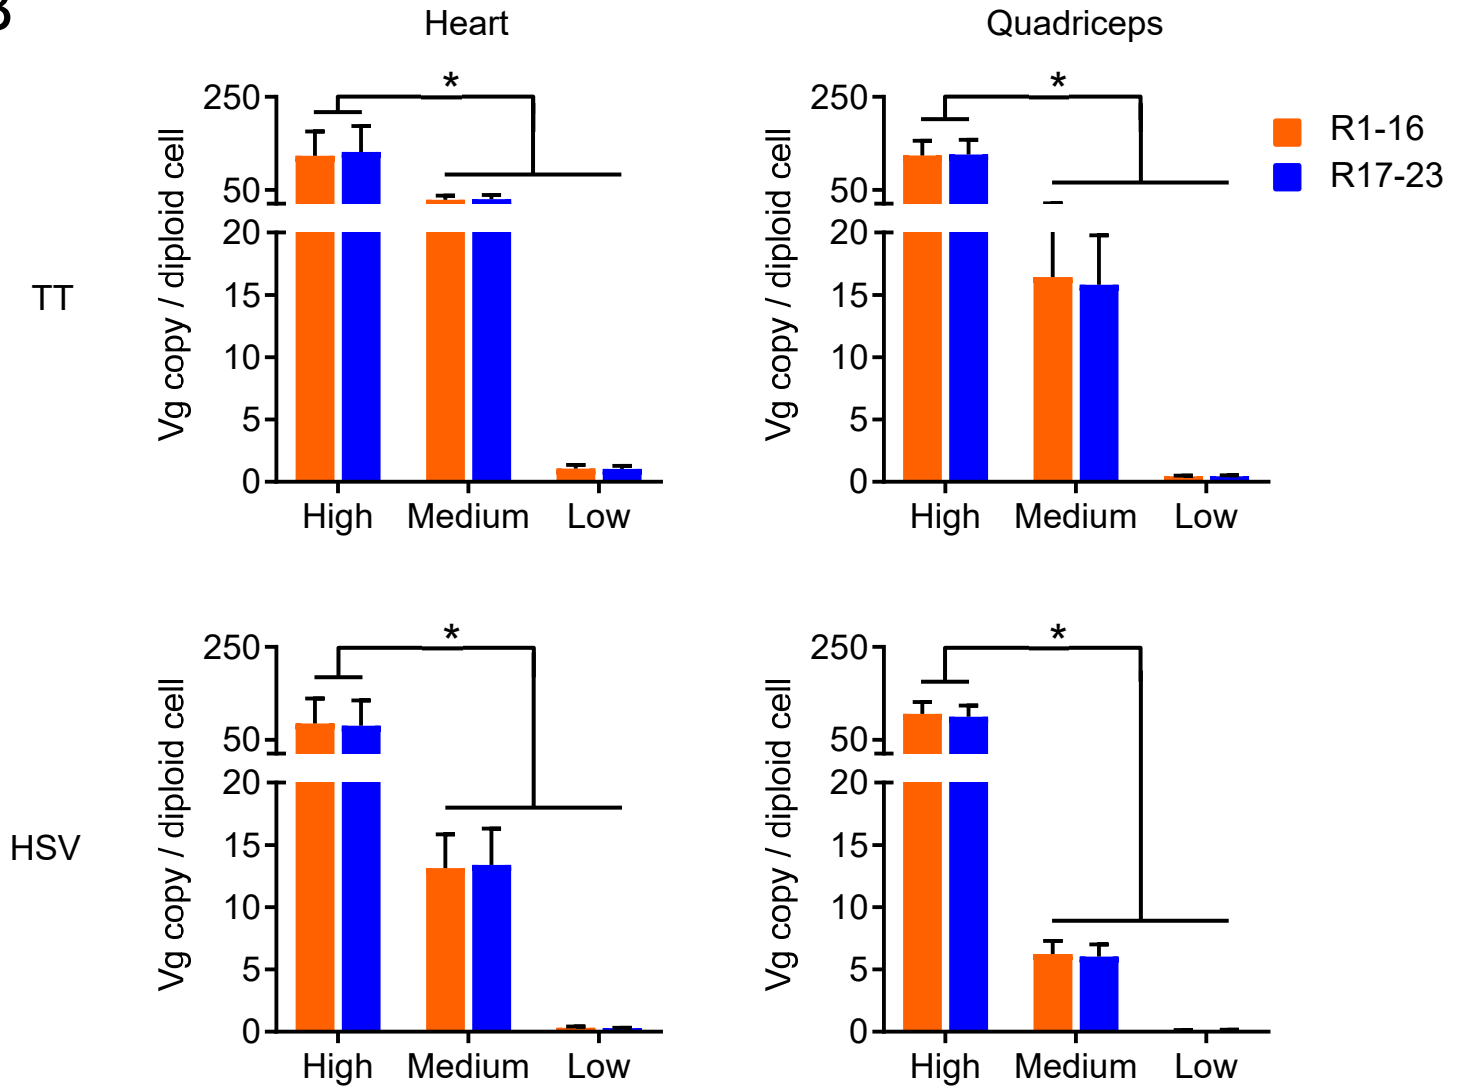

**Figure S3. Development of the TaqMan assay for AAV genome copy number**

**quantification in tissues.** **A**, Schematic illustration of the AAV micro-dystrophin gene vector. Micro-dystrophin consists of the N-terminal domain, two hinges (H1 and H4), five spectrin-like repeat (R1, R16, R17, R23 and R24) and the cysteine-rich (CR) domain. Micro-dystrophin expression is regulated by the muscle-specific CK8 promoter. Two different TaqMan PCR assays were designed to target two unique junctional regions (R1-R16 and R17-R23) in the micro-dystrophin gene. **B**, Quantification of the AAV genome copy number in the heart and quadriceps from treated mdx4cv mice using the R1-R16 and R17-R23 TaqMan assays. TT, AAV made with the transient transfection method. HSV, AAV made with the herpes simplex virus system. Asterisk (\*), significantly different from other groups.



## Supplemental Figure 4

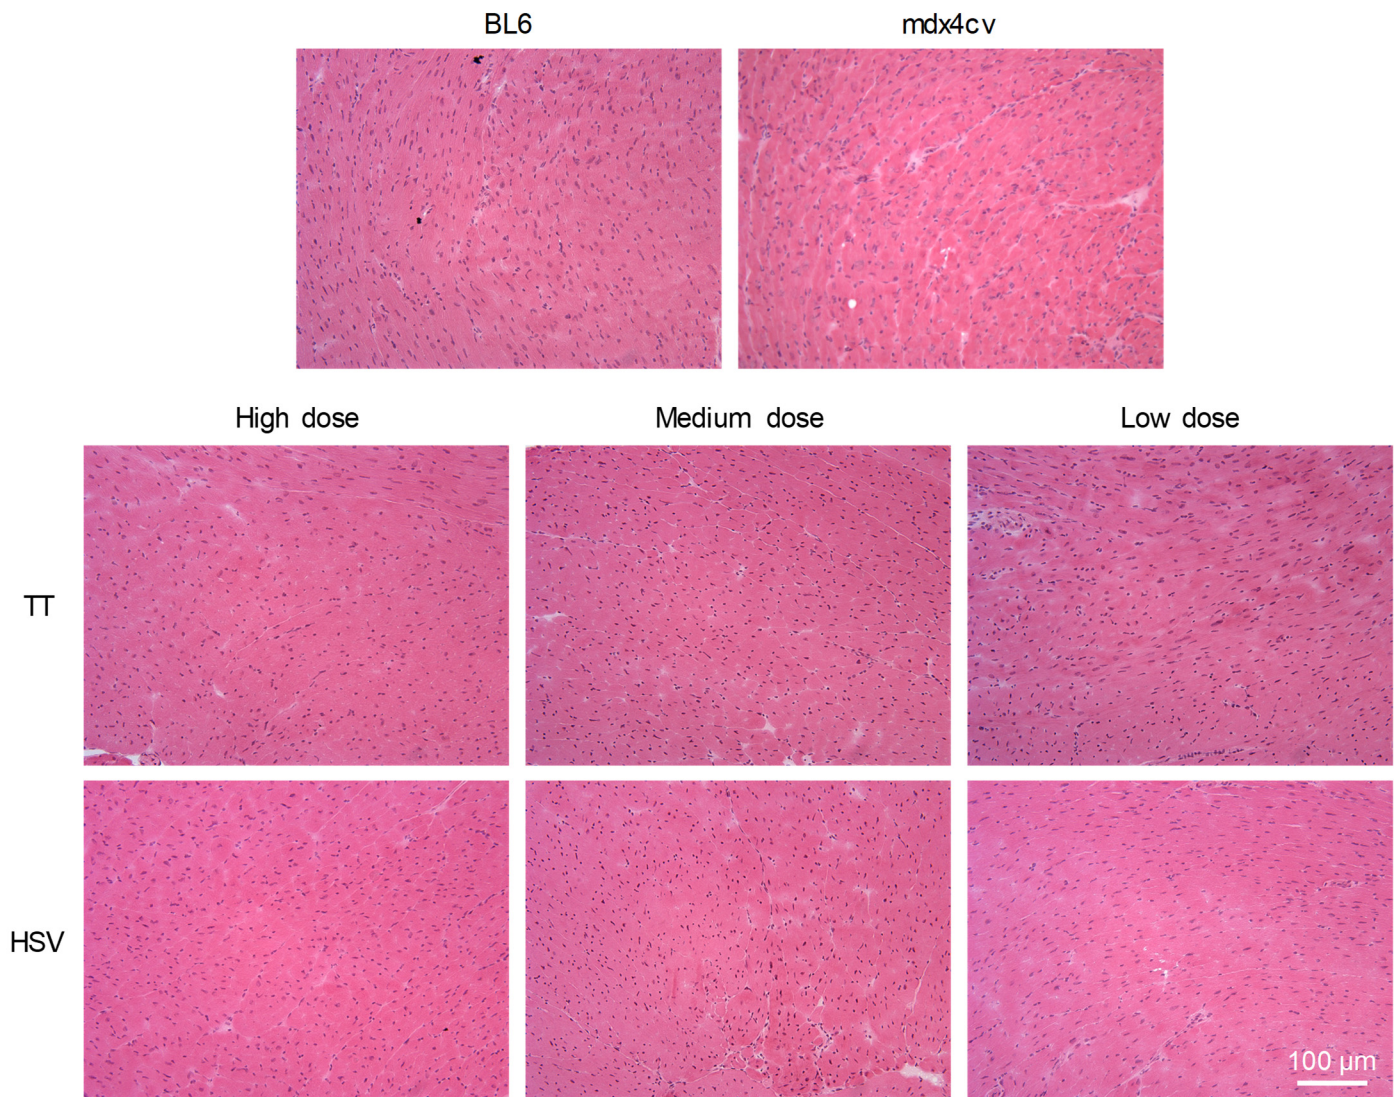

**Figure S4. Characterization of the heart histopathology.** Representative hematoxylin-eosin staining photomicrographs of the heart from untreated BL6, untreated mdx4cv and AAV injected mdx4cv mice. TT, AAV made with the transient transfection method. HSV, AAV made with the herpes simplex virus system.

**Supplementary Table 1. Morphometric properties of the EDL muscle**

| Strain     | Treatment group | AAV production method | EDL weight (mg)           | Lo (mm)                   | CSA (mm <sup>2</sup> )   | Pt (mN)                    | Po (mN)                     |
|------------|-----------------|-----------------------|---------------------------|---------------------------|--------------------------|----------------------------|-----------------------------|
| BL6 mdx4cv | untreated       | N/A                   | 8.68 ± 0.36               | 13.01 ± 0.11              | 1.44 ± 0.05              | 71.16 ± 2.03               | 350.79 ± 23.77              |
|            |                 |                       | 18.08 ± 1.46 <sup>a</sup> | 13.73 ± 0.12 <sup>a</sup> | 2.83 ± 0.21 <sup>a</sup> | 77.43 ± 4.91               | 407.27 ± 6.98               |
| mdx4cv     | High            | TT                    | 11.50 ± 0.48 <sup>b</sup> | 13.16 ± 0.18 <sup>b</sup> | 1.88 ± 0.05 <sup>b</sup> | 83.76 ± 5.61               | 402.55 ± 28.85              |
|            |                 | HSV                   | 11.28 ± 0.36 <sup>b</sup> | 13.12 ± 0.06 <sup>b</sup> | 1.85 ± 0.07 <sup>b</sup> | 93.31 ± 0.65               | 418.87 ± 6.41               |
|            | Medium          | TT                    | 12.59 ± 0.42 <sup>c</sup> | 13.11 ± 0.03 <sup>b</sup> | 2.07 ± 0.07 <sup>c</sup> | 92.26 ± 2.94               | 423.36 ± 14.52 <sup>a</sup> |
|            |                 | HSV                   | 12.59 ± 0.70 <sup>c</sup> | 13.03 ± 0.09 <sup>b</sup> | 2.08 ± 0.11 <sup>c</sup> | 91.37 ± 4.25               | 397.80 ± 11.62              |
|            | Low             | TT                    | 13.78 ± 0.24 <sup>c</sup> | 13.14 ± 0.13 <sup>b</sup> | 2.26 ± 0.02 <sup>c</sup> | 93.91 ± 11.26              | 398.78 ± 15.50              |
|            |                 | HSV                   | 15.32 ± 0.84 <sup>a</sup> | 13.35 ± 0.01              | 2.47 ± 0.13 <sup>a</sup> | 110.71 ± 4.40 <sup>c</sup> | 456.79 ± 13.32 <sup>a</sup> |

a, Significantly different from BL10

b, Significantly different from mdx4cv

c, Significantly different from BL10 and mdx4cv

Data are presented as mean ± standard error of mean

N/A; not applicable; TT, AAV made with the transient transfection method; HSV, AAV made with the herpes simplex virus system
